# Supplementary material for: Data-Driven De Novo Design of Super-Adhesive Hydrogels
Source: Research Square preprint supplement (doi:10.21203/rs.3.rs-5491059/v1), 2024-11-27
Supplement: Supplementary file 1 [file 5d5120a1c5c92244897da01e.xlsx]

## Sheet: Sheet1
Round	ML	Rank	No.	ΦHEA	ΦBA	ΦCBEA	ΦATAC	ΦPEA	ΦAAm	Fa	d
										(kPa)	(mm)
1	GP-enu	/	1	0.003	0.521	0.207	0.1	0.167	0.002	91.38	0.37
			2	0.015	0.578	0.089	0.098	0.181	0.038	136.11	0.41
			3	0.003	0.493	0.16	0.107	0.212	0.026	61.6	0.39
			4	0.001	0.46	0.204	0.104	0.179	0.053	114.93	0.37
			5	0.002	0.573	0.036	0.098	0.144	0.147	127.95	0.38
	RFR-enu	/	1	0.008	0.591	0.092	0.095	0.186	0.028	118.56	0.44
			2	0.132	0.587	0.007	0.075	0.097	0.102	111.76	0.38
			3	0.033	0.59	0.089	0.089	0.149	0.051	111.76	0.39
			4	0.048	0.592	0.036	0.077	0.146	0.101	102.31	0.43
			5	0.036	0.59	0.021	0.115	0.172	0.066	122.12	0.41
	GP_KB	EI	1	0	0.27	0.05	0.12	0.351	0.21	95.97	0.43
			2	0	0.439	0	0.06	0.14	0.361	72.13	0.38
			3	0	0.687	0	0.101	0.212	0	216.16	0.43
			4	0	0.67	0	0.1	0.17	0.06	169.68	0.44
			5	0	0.692	0	0.11	0.168	0.03	248.55	0.42
			6	0	0.681	0	0.11	0.15	0.06	164.42	0.47
			7	0.04	0.15	0.38	0.11	0.32	0	109.33	0.38
			8	0	0.68	0	0.1	0.17	0.05	134.81	0.47
			9	0	0.67	0	0.1	0.16	0.07	193.97	0.46
			10	0	0.729	0	0.11	0.14	0.02	199.35	0.45
		PRED	1	0	0.67	0	0.1	0.16	0.07	193.97	0.46
			2	0	0.67	0	0.1	0.17	0.06	169.68	0.44
			3	0	0.68	0	0.1	0.17	0.05	134.81	0.47
			4	0	0.67	0	0.1	0.23	0	216.62	0.41
			5	0	0.687	0	0.101	0.212	0	216.16	0.43
			6	0	0.681	0	0.11	0.15	0.06	164.42	0.47
			7	0	0.692	0	0.11	0.168	0.03	248.55	0.42
			8	0	0.687	0	0.111	0.202	0	228.62	0.46
			9	0	0.634	0	0.119	0.248	0	206.54	0.44
			10	0	0.729	0	0.11	0.14	0.02	199.35	0.45
	GP_CLmax	EI	1	0.273	0.525	0.05	0.071	0.081	0	123.43	0.38
			2	0.11	0.63	0.05	0.1	0.09	0.02	132.88	0.43
			3	0.09	0.69	0.06	0.1	0.06	0	128.29	0.42
			4	0.12	0.45	0.07	0.08	0.24	0.04	121.22	0.39
			5	0	0.697	0.01	0.091	0.102	0.101	145.85	0.48
	GP_CLmin	EI	1	0	0.37	0	0.14	0.48	0.011	198.22	0.49
			2	0	0.199	0.371	0.09	0.28	0.059	120.88	0.42
			3	0	0.18	0.07	0.07	0.25	0.43	71.56	0.4
			4	0	0.32	0.01	0.15	0.52	0	171.04	0.49
			5	0	0.24	0.11	0.06	0.23	0.36	123.43	0.37
	GP_LP	EI	1	0.08	0.59	0.04	0.13	0.15	0.01	115.33	0.47
			2	0.091	0.555	0.04	0.131	0.152	0.03	107.29	0.46
			3	0.149	0.231	0.08	0.18	0.36	0	139.79	0.51
			4	0.26	0.25	0.31	0.18	0	0	92.91	0.51
			5	0.05	0.429	0	0.23	0.28	0.01	116.8	0.47
			6	0.09	0.544	0.04	0.139	0.128	0.059	120.37	0.49
			7	0.13	0.109	0.208	0.198	0.317	0.04	87.64	0.56
			8	0.08	0.49	0	0.15	0.13	0.15	139.96	0.47
			9	0.071	0.525	0.05	0.141	0.181	0.031	153.83	0.47
			10	0.059	0.544	0.01	0.119	0.178	0.089	112.27	0.44
	GP-RFR	EI	1	0.069	0.327	0.03	0.337	0.227	0.01	110.29	0.68
			2	0.06	0.29	0.03	0.05	0.1	0.47	48.69	0.37
			3	0.05	0.24	0.03	0.08	0.29	0.31	74.11	0.36
			4	0.101	0.41	0.05	0.05	0.21	0.18	130.73	0.36
			5	0.079	0.515	0.04	0.04	0.307	0.02	254.04	0.35
			6	0.059	0.16	0.11	0.17	0.37	0.13	136.22	0.47
			7	0.02	0.32	0.04	0.041	0.06	0.519	74.73	0.38
			8	0.19	0.13	0.09	0.17	0.33	0.09	102.65	0.51
			9	0.12	0.09	0.11	0.08	0.15	0.45	42.41	0.41
			10	0.12	0.15	0.07	0.12	0.23	0.311	63.47	0.45
	RFR-RFR	EI	1	0.069	0.327	0.03	0.337	0.228	0.01	115.39	0.66
			2	0.071	0.283	0.02	0.041	0.384	0.202	182.99	0.39
			3	0.02	0.456	0.069	0.049	0.168	0.237	149.58	0.34
			4	0.07	0.38	0.04	0.05	0.14	0.32	87.98	0.35
			5	0.091	0.424	0.061	0.232	0.141	0.051	123.14	0.56
			6	0.099	0.081	0.179	0.07	0.149	0.421	37.31	0.39
			7	0.227	0.099	0.257	0.079	0.148	0.189	65.85	0.38
			8	0.021	0.32	0.04	0.041	0.06	0.519	37.14	0.35
			9	0.121	0.343	0.041	0.041	0.454	0	93.36	0.37
			10	0.179	0.25	0.121	0.16	0.27	0.02	123.14	0.5
	RFR-GP	EI	1	0	0.253	0.04	0.111	0.333	0.263	121.27	0.39
			2	0	0.505	0	0.071	0.151	0.273	138.2	0.43
			3	0	0.139	0.45	0.11	0.3	0	125.35	0.42
			4	0	0.586	0	0.081	0.333	0	272.38	0.41
			5	0.22	0.32	0	0.13	0.33	0	104.46	0.5
			6	0	0.669	0.18	0.081	0.07	0	110.86	0.41
			7	0.09	0.639	0	0.07	0.2	0	205.12	0.38
			8	0.12	0.5	0	0.07	0.31	0	258.17	0.42
			9	0	0.484	0	0.091	0.425	0	197.76	0.41
			10	0	0.68	0	0.1	0.22	0	321.19	0.43
		PRED	1	0	0.586	0	0.081	0.333	0	272.38	0.43
			2	0	0.8	0	0.1	0.1	0	189.1	0.45
			3	0	0.68	0	0.1	0.22	0	321.19	0.41
			4	0	0.68	0	0.11	0.21	0	278.33	0.44
			5	0	0.56	0	0.14	0.3	0	165.04	0.46
			6	0.09	0.639	0	0.07	0.2	0	205.12	0.37
			7	0	0.657	0	0.061	0.283	0	303.86	0.35
			8	0	0.47	0	0.09	0.33	0.11	163.51	0.46
			9	0	0.484	0	0.091	0.425	0	197.76	0.42
			10	0.12	0.5	0	0.07	0.31	0	258.17	0.39
	RFR-GP*	EI	1	0.02	0.25	0.03	0.12	0.31	0.271	153.55	0.4
			2	0	0.66	0	0.11	0.23	0	269.1	0.47
			3	0	0.78	0	0.1	0.12	0	247.02	0.45
			4	0	0	0.09	0.131	0.679	0.1	105.19	0.43
			5	0	0.431	0	0.18	0.389	0	189.84	0.49
			6	0	0.75	0	0.1	0.15	0	252.97	0.38
			7	0	0.62	0	0.15	0.23	0	260.38	0.51
			8	0	0.624	0	0.099	0.277	0	216.05	0.44
			9	0	0.67	0	0.12	0.07	0.14	167.64	0.4
			10	0.15	0.23	0.21	0.11	0.3	0	90.7	0.41
		PRED	1	0	0.588	0	0.094	0.318	0	353.29	0.4
			2	0	0.624	0	0.099	0.277	0	216.05	0.44
			3	0	0.78	0	0.1	0.12	0	247.02	0.45
			4	0	0.57	0	0.06	0.37	0	308.9	0.39
			5	0	0.62	0	0.15	0.23	0	260.38	0.51
			6	0	0.75	0	0.1	0.15	0	252.97	0.38
			7	0	0.66	0	0.11	0.23	0	269.1	0.47
			8	0.12	0.629	0	0.07	0.18	0	173.76	0.42
			9	0.039	0.535	0	0.059	0.278	0.089	195.78	0.4
			10	0	0.69	0	0.08	0.03	0.2	120.14	0.42
	RFR-ETR	PRED	1	0.02	0.589	0.05	0.05	0.1	0.19	102.19	0.35
			2	0.09	0.57	0.031	0.05	0.16	0.1	84.13	0.35
			3	0.079	0.584	0.07	0.069	0.079	0.119	95.97	0.36
			4	0.02	0.609	0.031	0.08	0.08	0.18	134.13	0.38
			5	0.01	0.719	0.021	0.1	0.09	0.06	171.15	0.44
			6	0.069	0.722	0.03	0.07	0.089	0.02	133.56	0.43
			7	0.01	0.6	0.03	0.06	0.05	0.25	146.47	0.36
			8	0.01	0.653	0.03	0.06	0.01	0.238	176.02	0.35
			9	0.17	0.59	0.01	0.04	0.04	0.15	115.05	0.34
			10	0.12	0.58	0.04	0.17	0.08	0.01	171.38	0.56
	RFR-GBM	PRED	1	0.11	0.589	0.03	0.08	0.18	0.01	141.54	0.43
			2	0.09	0.579	0.031	0.1	0.12	0.08	192.72	0.42
			3	0.011	0.586	0.07	0.121	0.151	0.061	250.87	0.46
			4	0.03	0.619	0.031	0.1	0.22	0	224.03	0.42
			5	0.069	0.611	0.06	0.05	0.14	0.07	164.25	0.38
			6	0.051	0.565	0.021	0.06	0.243	0.061	173.31	0.4
			7	0.131	0.535	0.03	0.101	0.162	0.041	144.6	0.37
			8	0.05	0.55	0.02	0.09	0.27	0.02	183.44	0.43
			9	0.08	0.544	0.041	0.152	0.132	0.051	249.23	0.37
			10	0.03	0.549	0.031	0.07	0.32	0	42.18	0.52
2	RFR-GP	EI	1	0	0.55	0	0.06	0.31	0.08	221.2	0.4
			2	0.37	0.39	0	0.03	0.21	0	130.9	0.36
			3	0.202	0.182	0.202	0.202	0.01	0.202	47.84	0.7
			4	0	0.05	0	0.32	0.31	0.32	78.47	0.7
			5	0.25	0.03	0	0.25	0.22	0.25	99.31	0.6
			6	0	0.03	0.35	0.35	0.27	0	89.74	0.7
			7	0	0.42	0	0.07	0.13	0.38	69.53	0.36
			8	0	0.172	0.111	0.323	0.232	0.162	97.04	0.65
			9	0	0.262	0.263	0.101	0.111	0.263	107.8	0.37
			10	0	0.172	0	0.323	0.02	0.485	3.11	1.09
		PRED	1	0	0.619	0	0.17	0.21	0	219.39	0.51
			2	0	0.58	0	0.42	0	0	NO GELATION	/
			3	0	0.63	0	0.3	0.07	0	101.8	0.56
			4	0	0.46	0	0.2	0.34	0	195.73	0.58
			5	0	0.21	0	0.45	0.34	0	131.01	0.76
			6	0	0.37	0	0.25	0.38	0	128.41	0.58
			7	0	0.475	0	0.283	0.242	0	153.83	0.63
			8	0	0.19	0	0.36	0.45	0	152.87	0.63
			9	0	0.55	0	0.06	0.31	0.08	221.2	0.4
			10	0	0.351	0	0.319	0.239	0.09	157.85	0.65
	GP_KB	EI	1	0	0.55	0	0.06	0.31	0.08	221.2	0.4
			2	0.01	0.606	0	0.061	0.324	0	263.72	0.4
			3	0	0.436	0	0.079	0.139	0.347	105.19	0.4
			4	0	0.636	0	0.132	0.232	0	239.26	0.44
			5	0	0.629	0	0.061	0.31	0	281.61	0.37
			6	0	0.61	0	0.05	0.34	0	253.7	0.38
			7	0	0.65	0	0.01	0.34	0	152.98	0.36
			8	0	0.64	0	0.05	0.31	0	241.13	0.37
			9	0	0.64	0	0.05	0.31	0	241.13	0.37
			10	0	0.39	0	0.13	0.48	0	197.54	0.45
		PRED	1	0	0.65	0	0.01	0.34	0	152.98	0.36
			2	0	0.62	0	0.03	0.35	0	177.44	0.35
			3	0	0.61	0	0.04	0.35	0	196.46	0.35
			4	0	0.64	0	0.05	0.31	0	241.13	0.37
			5	0	0.61	0	0.05	0.34	0	253.7	0.38
			6	0	0.61	0	0.04	0.35	0	196.46	0.35
			7	0	0.606	0	0.04	0.353	0	206.71	0.39
			8	0	0.61	0	0.05	0.34	0	253.7	0.38
			9	0	0.64	0	0.05	0.31	0	241.13	0.37
			10	0	0.629	0	0.061	0.31	0	281.61	0.37
3	RFR-GP	EI	1	0	0.54	0	0.06	0.25	0.15	101.34	0.45
			2	0	0.61	0	0.08	0.31	0	229.7	0.39
			3	0	0.303	0	0.162	0.263	0.273	160.28	0.49
			4	0	0.172	0.293	0.071	0.203	0.262	100.89	0.36
			5	0.24	0.33	0	0.05	0.15	0.23	91.04	0.38
			6	0	0.25	0.18	0.19	0.38	0	127.67	0.52
			7	0	0.51	0	0.05	0.44	0	NO GELATION	/
			8	0	0.426	0	0.139	0.386	0.049	117.31	0.52
			9	0	0.297	0	0.208	0.297	0.198	155.07	0.5
			10	0	0.257	0.089	0.139	0.257	0.257	74.51	0.46
		PRED	1	0	0.61	0	0.08	0.31	0	229.7	0.39
			2	0	0.57	0	0.1	0.33	0	206.65	0.43
			3	0	0.51	0	0.05	0.44	0	NO GELATION	/
			4	0	0.54	0	0.06	0.25	0.15	101.34	0.45
			5	0	0.426	0	0.139	0.386	0.049	117.31	0.52
			6	0.021	0.333	0.02	0.232	0.363	0.031	193.57	0.54
			7	0	0.297	0	0.208	0.297	0.198	155.07	0.5
			8	0.01	0.41	0.02	0	0.4	0.16	62.22	0.41
			9	0.148	0.366	0.01	0.079	0.386	0.01	148	0.41
			10	0	0.303	0	0.162	0.263	0.273	160.28	0.49
	GP_KB	EI	1	0	0.544	0	0.06	0.252	0.143	101.63	0.43
			2	0	0.61	0	0.08	0.31	0	229.7	0.39
			3	0	0.34	0	0.05	0.16	0.45	75.13	0.35
			4	0	0.65	0	0.08	0.27	0	245.1	0.42
			5	0	0.277	0	0.148	0.238	0.336	109.95	0.46
			6	0	0.63	0	0.05	0.32	0	200.08	0.39
			7	0	0.68	0	0.07	0.25	0	250.98	0.4
			8	0	0.32	0.21	0.17	0.3	0	81.08	0.48
			9	0	0.64	0	0.07	0.29	0	235.47	0.36
			10	0	0.6	0	0.07	0.33	0	225.39	0.4
		PRED	1	0	0.61	0	0.08	0.31	0	229.7	0.39
			2	0	0.6	0	0.07	0.33	0	225.39	0.4
			3	0	0.606	0	0.081	0.313	0	229.75	0.42
			4	0	0.6	0	0.07	0.33	0	225.39	0.4
			5	0	0.64	0	0.07	0.29	0	235.47	0.36
			6	0	0.65	0	0.08	0.27	0	245.1	0.42
			7	0	0.666	0	0.081	0.253	0	232.07	0.43
			8	0	0.63	0	0.05	0.32	0	200.08	0.39
			9	0	0.68	0	0.07	0.25	0	250.98	0.4
			10	0	0.484	0	0.061	0.455	0	199.12	0.39
