# Supplementary material for: Data-Driven De Novo Design of Super-Adhesive Hydrogels
Source: Research Square preprint supplement (doi:10.21203/rs.3.rs-5491059/v1), 2024-11-27
Supplement: Supplementary file 2 [file 8b576ea82e60876b6416e580.xlsx]

## Sheet: Sheet1
No.	ΦHEA	ΦBA	ΦCBEA	ΦATAC	ΦPEA	ΦAAm	Fa (kPa)	d (mm)
G-001	0.52	0.2	0.09	0.19	0	0	22.36	0.68
G-002	0.42	0.41	0.17	0	0	0	12.57	0.31
G-003	0.54	0.11	0.18	0.17	0	0	10.93	0.71
G-004	0.22	0.2	0.09	0.17	0.32	0	126.82	0.53
G-005	0.12	0.41	0.19	0.19	0.09	0	109.27	0.52
G-006	0.23	0.3	0.47	0	0	0	7.19	0.33
G-007	0.51	0.22	0.1	0.17	0	0	39.97	0.66
G-008	0.43	0.38	0.1	0.09	0	0	77.57	0.4
G-009	0.44	0.18	0.38	0	0	0	11.04	0.35
G-010	0.64	0.11	0.09	0.08	0.08	0	77	0.42
G-011	0.51	0.31	0.1	0.09	0	0	44.22	0.42
G-012	0.31	0.22	0.39	0.08	0	0	103.61	0.37
G-013	0.21	0.51	0.2	0.08	0	0	104.74	0.35
G-014	0.23	0.5	0.18	0	0.09	0	21.23	0.31
G-015	0.23	0.5	0.1	0.16	0	0	67.37	0.53
G-016	0.19	0.4	0.23	0.1	0.08	0	58.88	0.38
G-017	0.41	0.42	0.18	0	0	0	10.02	0.33
G-018	0.55	0.27	0.08	0.09	0	0	69.64	0.48
G-019	0.54	0.22	0.15	0.09	0	0	50.39	0.44
G-020	0.57	0.25	0.09	0.09	0	0	44.78	0.41
G-021	0.57	0.25	0.09	0.09	0	0	51.24	0.45
G-022	0.43	0.3	0.09	0.18	0	0	60.01	0.63
G-023	0.19	0.35	0.45	0	0	0	6.51	0.3
G-024	0.51	0.23	0.18	0.08	0	0	60.58	0.42
G-025	0.51	0.23	0.17	0.09	0	0	66.58	0.43
G-026	0.55	0.21	0.17	0.06	0	0	70.21	0.41
G-027	0.51	0.23	0.19	0.07	0	0	67.94	0.38
G-028	0.52	0.21	0.08	0.18	0	0	19.53	0.63
G-029	0.23	0.5	0.18	0.09	0	0	69.02	0.37
G-030	0.52	0.23	0.09	0.16	0	0	47.39	0.61
G-031	0.51	0.3	0.1	0.09	0	0	38.56	0.41
G-032	0.31	0.45	0.15	0	0.09	0	21.46	0.33
G-033	0.51	0.23	0.09	0.17	0	0	39.52	0.62
G-034	0.5	0.36	0	0.15	0	0	79.04	0.6
G-035	0.21	0.51	0.09	0.19	0	0	96.42	0.55
G-036	0.42	0.4	0.18	0	0	0	16.02	0.32
G-037	0.51	0.31	0.1	0.09	0	0	44.16	0.4
G-038	0.59	0.09	0.25	0.06	0	0	66.24	0.42
G-039	0.52	0.22	0.09	0.17	0	0	24.57	0.65
G-040	0.29	0.09	0	0.22	0.4	0	107.57	0.54
G-041	0.12	0.62	0.09	0.08	0.09	0	123.99	0.38
G-042	0.14	0.59	0.08	0.1	0.1	0	146.64	0.37
G-043	0.46	0.38	0.08	0.08	0	0	53.62	0.38
G-044	0.52	0.22	0.09	0.17	0	0	41.84	0.7
G-045	0.4	0.31	0.09	0.2	0	0	56.62	0.63
G-046	0.58	0.18	0.09	0.15	0	0	28.93	0.68
G-047	0.5	0.23	0.08	0.18	0	0	34.48	0.64
G-048	0.43	0.4	0	0.17	0	0	67.94	0.6
G-049	0.38	0.41	0.21	0	0	0	13.81	0.32
G-050	0.53	0.29	0.09	0.09	0	0	33.57	0.45
G-051	0.57	0.19	0.15	0.09	0	0	88.89	0.41
G-052	0.23	0.45	0.23	0	0.1	0	51.07	0.34
G-053	0.45	0.39	0.09	0.07	0	0	69.81	0.34
G-054	0.42	0.39	0.09	0.1	0	0	64.32	0.4
G-055	0.56	0.21	0.15	0.08	0	0	52.09	0.42
G-056	0.34	0.48	0.08	0.09	0	0	19.19	0.38
G-057	0.24	0.5	0.19	0	0.07	0	7.19	0.29
G-058	0.37	0.2	0.43	0	0	0	9.17	0.3
G-059	0.52	0.21	0.19	0.08	0	0	95.68	0.43
G-060	0.41	0.33	0.18	0.08	0	0	90.3	0.32
G-061	0.51	0.22	0.19	0.08	0	0	87.19	0.37
G-062	0.56	0.28	0.08	0.08	0	0	41.5	0.41
G-063	0.46	0.28	0.18	0.08	0	0	87.76	0.35
G-064	0.45	0.4	0.15	0	0	0	8.49	0.28
G-065	0.5	0.08	0.26	0.17	0	0	8.15	0.64
G-066	0.49	0.1	0.23	0.18	0	0	10.7	0.63
G-067	0.44	0.39	0.08	0.08	0	0	37.65	0.45
G-068	0.39	0.44	0.09	0.08	0	0	48.35	0.38
G-069	0.44	0.19	0	0	0.37	0	3.34	0.35
G-070	0.47	0.37	0	0.16	0	0	49.99	0.56
G-071	0.51	0.22	0.09	0.18	0	0	21.06	0.62
G-072	0.23	0.5	0.21	0.07	0	0	72.81	0.37
G-073	0.21	0.52	0.2	0.08	0	0	87.53	0.37
G-074	0.55	0.2	0.17	0.07	0	0	104.74	0.3
G-075	0.22	0.51	0.2	0.07	0	0	73.6	0.35
G-076	0.24	0.49	0.18	0.09	0	0	88.89	0.31
G-077	0.29	0.39	0	0.05	0.28	0	42.18	0.39
G-078	0.27	0	0	0.36	0.37	0	1.76	0.77
G-079	0.17	0.54	0.06	0.15	0.08	0	91.66	0.45
G-080	0.52	0.21	0	0.18	0.09	0	23.21	0.59
G-081	0.35	0.48	0.08	0.09	0	0	103.5	0.45
G-082	0.35	0.4	0.16	0.09	0	0	51.52	0.34
G-083	0.42	0.39	0.2	0	0	0	9.46	0.29
G-084	0.43	0.32	0.16	0.08	0	0	81.87	0.35
G-085	0.54	0.31	0.08	0.08	0	0	66.47	0.38
G-086	0.21	0.08	0	0.48	0.22	0	1.19	0.76
G-087	0.18	0.11	0	0.52	0.19	0	8.1	0.8
G-088	0.42	0.36	0.22	0	0	0	11.89	0.35
G-089	0.35	0.19	0.46	0	0	0	3.62	0.32
G-090	0.42	0.39	0.19	0	0	0	4.76	0.34
G-091	0.45	0.28	0.18	0.08	0	0	22.53	0.36
G-092	0.41	0.3	0.09	0.2	0	0	22.93	0.69
G-093	0.52	0.2	0.1	0.19	0	0	11.89	0.64
G-094	0.36	0.4	0.25	0	0	0	5.15	0.31
G-095	0.24	0.37	0.39	0	0	0	9.23	0.31
G-096	0.55	0.22	0.18	0.06	0	0	87.7	0.36
G-097	0.13	0.63	0.12	0.07	0.06	0	82.43	0.32
G-098	0.21	0.55	0.18	0.06	0	0	85.49	0.3
G-099	0.41	0.22	0.09	0.28	0	0	1.42	0.74
G-100	0.55	0.12	0.17	0.16	0	0	3.51	0.73
G-101	0.55	0.21	0.17	0.07	0	0	49.37	0.37
G-102	0.55	0.29	0.08	0.09	0	0	27.91	0.43
G-103	0.09	0.49	0.21	0.22	0	0	66.24	0.5
G-104	0.12	0.58	0.11	0.12	0.06	0	97.38	0.39
G-105	0.11	0.4	0.2	0.21	0.08	0	83.79	0.53
G-106	0.51	0.11	0.19	0.19	0	0	2.26	0.77
G-107	0.13	0.59	0.09	0.09	0.1	0	137.01	0.35
G-108	0.12	0.59	0.1	0.11	0.09	0	107.57	0.38
G-109	0.12	0.4	0.19	0.2	0.09	0	77.11	0.53
G-110	0.23	0.49	0.18	0.09	0	0	71.34	0.35
G-111	0.22	0.5	0.19	0.09	0	0	76.21	0.34
G-112	0.24	0.49	0.17	0.1	0	0	93.81	0.38
G-113	0.54	0.31	0.07	0	0.08	0	7.25	0.36
G-114	0.38	0.37	0	0	0.26	0	11.15	0.33
G-115	0.45	0.28	0.18	0.08	0	0	93.42	0.36
G-116	0.37	0.4	0.07	0.08	0.07	0	40.14	0.43
G-117	0.49	0.37	0	0.14	0	0	62.28	0.52
G-118	0.55	0.29	0.08	0.09	0	0	21.68	0.46
G-119	0.56	0.29	0.07	0	0.08	0	15.06	0.3
G-120	0.13	0.4	0.2	0.17	0.1	0	87.19	0.49
G-121	0.23	0.5	0.18	0.1	0	0	59.45	0.37
G-122	0.52	0.3	0.1	0.09	0	0	21.91	0.41
G-123	0.29	0.19	0	0.3	0.22	0	43.77	0.66
G-124	0.44	0.19	0	0	0.37	0	11.83	0.37
G-125	0.42	0.4	0.1	0	0.09	0	12.74	0.31
G-126	0.54	0.29	0.09	0	0.08	0	18.34	0.31
G-127	0.29	0.09	0	0.22	0.4	0	63.41	0.51
G-128	0.51	0.22	0.08	0.19	0	0	19.53	0.66
G-129	0.51	0.3	0.1	0.09	0	0	24.12	0.47
G-130	0.08	0.42	0.2	0.21	0.08	0	69.64	0.58
G-131	0.09	0.5	0.21	0.2	0	0	82.66	0.53
G-132	0.29	0.09	0	0.22	0.4	0	71.9	0.56
G-133	0.51	0.23	0.09	0.17	0	0	25.19	0.63
G-134	0.47	0.35	0.18	0	0	0	4.19	0.36
G-135	0.22	0.31	0.39	0	0.07	0	16.02	0.32
G-136	0.3	0.24	0.39	0	0.07	0	1.92	0.31
G-137	0.28	0.08	0	0.22	0.42	0	77	0.56
G-138	0.57	0.2	0.17	0.07	0	0	41.95	0.39
G-139	0.37	0.4	0.23	0	0	0	4.36	0.32
G-140	0.21	0.4	0.09	0.1	0.09	0.1	95.68	0.37
G-141	0.24	0.42	0.16	0.09	0	0.09	101.46	0.4
G-142	0.1	0.41	0.19	0.21	0	0.09	89.68	0.58
G-143	0.2	0.34	0.37	0	0	0.09	11.21	0.3
G-144	0.66	0.08	0.09	0	0.09	0.09	11.32	0.38
G-145	0.57	0.28	0.08	0	0	0.07	14.95	0.31
G-146	0.14	0.57	0.11	0	0.09	0.1	32.55	0.34
G-147	0.51	0.3	0.13	0	0	0.06	17.1	0.28
G-148	0.46	0.41	0.07	0	0	0.06	14.95	0.3
G-149	0.11	0.43	0.18	0.19	0	0.09	83.62	0.5
G-150	0.65	0.1	0.07	0.08	0	0.1	25.53	0.5
G-151	0.63	0.12	0.09	0	0.08	0.08	15.4	0.3
G-152	0.14	0.58	0.1	0.09	0	0.09	113.8	0.32
G-153	0.16	0.58	0.1	0.09	0	0.07	107.86	0.35
G-154	0.14	0.58	0.1	0.1	0	0.09	121.33	0.36
G-155	0.39	0.34	0.17	0	0	0.1	15.68	0.35
G-156	0.63	0.14	0.09	0.08	0	0.07	37.54	0.53
G-157	0.61	0.11	0.07	0	0.14	0.07	5.32	0.32
G-158	0.47	0.21	0.27	0	0	0.05	4.59	0.3
G-159	0.33	0.43	0.08	0	0.07	0.09	18.34	0.3
G-160	0.34	0.52	0.06	0	0	0.08	12.23	0.31
G-161	0.47	0.36	0	0	0	0.17	13.14	0.28
G-162	0.54	0.27	0.1	0	0	0.08	16.48	0.29
G-163	0.1	0.42	0.2	0.2	0	0.08	91.15	0.48
G-164	0.13	0.58	0.12	0.08	0	0.09	118.9	0.32
G-165	0.57	0.2	0.16	0	0	0.08	7.64	0.32
G-166	0.22	0.41	0.09	0	0.09	0.2	20.1	0.3
G-167	0.16	0.44	0.13	0.12	0	0.15	97.38	0.4
G-168	0.21	0.4	0.21	0	0.08	0.09	8.89	0.3
G-169	0.26	0.5	0.16	0	0	0.07	13.53	0.3
G-170	0.53	0.3	0	0.09	0	0.08	65.11	0.47
G-171	0.22	0.19	0.11	0.19	0	0.3	20.38	0.74
G-172	0.43	0.08	0.25	0.18	0	0.06	7.25	0.61
G-173	0.56	0.2	0.16	0	0	0.08	2.66	0.32
G-174	0.63	0.15	0	0.07	0.08	0.07	61.77	0.42
G-175	0.14	0.6	0.11	0.09	0	0.06	48.35	0.37
G-176	0.21	0.19	0.11	0.19	0	0.3	12.97	0.65
G-177	0	0.29	0.24	0.39	0	0.08	31.65	0.74
G-178	0.26	0.49	0.17	0	0	0.07	8.32	0.32
G-179	0.55	0.2	0.16	0	0	0.08	5.89	0.33
G-180	0.53	0.28	0.1	0	0	0.08	1.19	0.36
